# Supplementary material for: Atmospheric CO 2 observations and models suggest strong carbon uptake by forests in New Zealand
Source: Copernicus journal article supplement (doi:10.5194/acp-2016-254), 2016-04-13
Supplement: Supplementary file [file acp-2016-254-AC1-supplement.pdf]

## Revision of ACP manuscript acp-2016-254

*“Atmospheric CO<sub>2</sub> observations and models suggest strong carbon uptake by forests in New Zealand”*

by K. Steinkamp, S.E. Mikaloff Fletcher, G. Brailsford, D. Smale, S. Moore,  
E.D. Keller, W.T. Baisden, H. Mukai and B.B. Stephens

August 20<sup>th</sup> 2016

Dear Editors,

The co-authors and I would like to thank the anonymous referees #1 and #2 for providing constructive reviews. They helped us to improve and clarify the paper. We have responded fully to both reviews below, and we would be delighted to submit a revised manuscript.

This process has taken a bit longer than desired, largely owing to our decision to develop an additional test case for our model to address concerns of referee #2 regarding the diurnal cycle of CO<sub>2</sub> land fluxes in New Zealand.

We thank you for your continued consideration of this manuscript.

Sincerely,

Kay Steinkamp

## Anonymous Referee #1 – Interactive Comment

*This paper presents the first regional CO<sub>2</sub> inversion for New Zealand. The inversion yields posterior spatiotemporal CO<sub>2</sub>-flux distributions which are surprisingly different from the priors (calculated with the Biome-BGC model) and also different from the National Inventory Report.*

*My overall judgment of the paper is quite favorable, and I recommend publication with minor revisions provided the questions below can be handled satisfactory. A good use has been made of the literature, and the language needs in my opinion but very little correction. The methods are generally well-considered, though some questions remain (see below). Some details, especially the methods to solve the difficult problem of determining the “background” (influence of lateral boundary conditions for the concentration) I find difficult to judge from my own experience, but I would trust them from what I have read here.*

We thank the referee for his/her support and the helpful and insightful comments. We believe we have been able to improve this manuscript by implementing many of this referee's comments, although not all, as explained in detail below.

*Descriptions are mostly clear and complete. Some descriptions are quite lengthy, however, and my impression is that especially the descriptions of the observations methods at the Lauder station (Appendix A), and the footprints etc. for each station, could probably be condensed.*

We agree that the description of the Lauder station in Appendix A is unusually lengthy. In order to address this, we have condensed sections A.1, A.3 and A.4 and reduced the overall section size by about half a page (the new section is printed below). Usually, we would reference to a published paper that is dedicated to explaining the Lauder site and the instruments installed and operated there. Then it would be possible to provide a summarized description here, similar to our handling of the Baring Head station, instruments and data, which are described in detail by, e.g., Brailsford et al (2012) and Stephens et al. (2013). However, the Lauder CO<sub>2</sub> dataset is a new dataset introduced to the community and, to date, there is no published source available describing the site. Thus, it is essential to provide a conscientious, complete and transparent description here. We put the detailed descriptions in an appendix, so as to not disrupt the flow of the manuscript, while keeping a brief summary in the main text. This also allows for Appendix A to be used in future papers as the site/instrument reference.

Similarly, the station footprint analyses contain a wealth of information that is very relevant to this work and future work but have not been published elsewhere.

### A.1 The Lauder station

The Lauder atmospheric research station (45.038S, 169.684E, 370m AMSL) is located in the broad Manuherikia river valley on the South Island of New Zealand. A semi-arid continental climate predominates with an annual rainfall of 450mm and mean annual temperature of 9.7C. The prevailing wind is from the westerly quarter (a mean daily wind run of approximately 300 km). Periodic southerly frontal systems bring air masses from the Southern Ocean and Tasman Sea. The station is surrounded by pastoral land dominated by non-intensive sheep and cattle farming practices along with seasonal cropping. The valley is sparsely populated. The land westward (on average upwind) of the valley consists of numerous valley systems and mountainous terrain. The vast majority of this land is undeveloped and is part of New Zealand's national park system. There is no major industry present in the region.

Due to the relatively clear unclouded skies, low light pollution and low levels of local and regional anthropogenic emissions, ‘clean air’ ground-based remote sensing, balloon sonde and *in situ* measurements are routinely conducted at the station as part of NDACC (formerly known as NDSC) (Kurylo, 1991), GAW (WMO-GAW, 2007), TCCON (Wunch et al., 2011) and GRUAN (Seidel et al., 2009) activities.

### A.3 Air inlet system

The air inlet system consists of a permanent 10 m high metal NIWA meteorological mast erected at a distance of 33 m to the north, of the nearest building, housing the *in situ*

instrumentation. Two sets of 60 m long stainless steel (SS) tubing (ID 8.8 mm) are used to sample air from the mast (inlet at 10 m) to two distribution manifolds, prior to 2012 these were baked copper tube (ID 8.8 mm). The inlets are fitted with inverted funnels with coarse mesh (0.7 mm) to provide rain and dust protection. For electrical isolation of the instrumentation and the meteorological mast, a 100 mm length of PFA 9.5 mm tubing is inserted between the sampling lines and the manifolds. The manifolds are constructed from 25 mm SS diameter tubing 200 mm in length (volume = 0.086 l). Each port consists of a SS tube (OD 6.3 mm) welded perpendicular to the main body, these extend 15 mm centrally into the main body and terminated with a 45 degree angle cut facing the direction of flow. Sample air is drawn into the two 4-port manifolds with a roughing pump (KNF Neuberger, N035 AN18) at 10-15 l min<sup>-1</sup> giving an effective residence time of approximately 35 seconds and an associated pressure drop of 40 mbar. The roughing pump allows sample air to be drawn at a higher flow rate and allows multiple instruments to sample air without front end pressure coupling between co-sampling instruments.

The LI-7000 samples air at 2.6 l min<sup>-1</sup> from one of the manifolds connected to the 10 m sampling inlet, with Synflex (Eaton Synflex 1300, OD = 6.3 mm) tubing. An FTIR trace gas analyser samples air from a port on the same manifold through a 6.3 mm PFA tube (300 mm length) at a rate of 3.5 l min<sup>-1</sup>, and a flask sampling system is connected to the same manifold port with Nylon (Ledalon© 1200 Series Nylon 12 Tubing, OD = 3.2mm) tubing. When flask samples are taken a flow rate of up to 2 l min<sup>-1</sup> is used.

#### A.4 LI-7000

A commercially available dual cell Licor NDIR analyser the LI-7000 is able to calculate CO<sub>2</sub> mole fractions via measurements in the CO<sub>2</sub> 4.255 µm absorption band. The LI-7000 has been proven to be a low maintenance robust CO<sub>2</sub> analyser able to meet GAW measurement criteria when operated in the correct manner (WMO, 2001). A gas delivery and data acquisition and diagnostics system designed by NIWA (Gomez, 1997) on a LabView© platform is used to automate and manage the delivery sample and reference air along with calibration gas. The Lauder gas handling and data acquisition system is similar to that described by Brailsford et al. (2012). The main difference is that a LI-7000 is employed at Lauder whereas at Baring Head a Siemens Ultramat 3 gas analyser is used.

The LI-7000 draws air from the manifold via a diaphragm pump (KNF Neuberger, KNF 86KNE, 2.6 Lmin<sup>-1</sup>). A set of four Field standards, with a calibration lineage to the mole fraction scale maintained by the CCL and a target/archive tank are connected to a valve manifold consisting of five three-way (Parker B16DK1175) valves in a daisy chain configuration, along with the dried air allowing selection of either Field standards, target tank or sample air for the analyser. Gas regulators (Scott Marrin Inc, 1-SS30-590-DAT) and 1.6 mm SS tubing are used to connect tanks to the gas delivery system. On the outlet of the sample pump an overpressure is maintained on the inlet to a Nafion drier (Perma Pure LLC, MD-110-144S-4) with the excess flow vented at this point, this removes the bulk of the water content from the sample flow. The air or selected calibration gas then passes through a magnesium perchlorate trap to ensure all the same low water content for gas being introduced to the analyser by a 100 sccm mass flow controller (McMillian, 80SD-5). One of the Field standards is also used in the reference cell as a reference gas, and is controlled using a similar mass flow controller (McMillian, 80SD-3) at 10 sccm. The exhaust sample and reference gas are joined together and then dried again on molecular sieve trap before acting as the counter flow on the Nafion drier, in this way dew points of -65°C are consistently met.

The data acquisition system selects the calibration gas to measure and monitors each Field standard for stability to optimise the gas consumption. When a Field standard has a standard deviation of less than 0.015 ppm over a minute it is defined as stable and the next gas is measured. Sample air is continuously measured with 5-minute averages collated and reported. Every 4-6 hours the suite of four Field standards is measured. A target/archive tank is measured every 23 hours. Each week the Field standards and target tank are measured as a separate aliquot multiple times. This sampling sequence is akin to the calibration protocol employed by Brailsford et al. (2012) and Stephens et al. (2011). Data processing is performed by Lauder LI-7000 specific scripts adapted from those used by (Stephens et al., 2011) and written in the free statistical analysis software R.

Allan variance measurements (Allan, 1966) show the precision of the Lauder LI-7000 system as 0.004 ppm (1 sigma in five minutes). Calibration of the LI-7000 is obtained by fitting a 3rd order polynomial to the measurements of the four Field standards to characterise the concentration dependent nonlinear response of the instrument every 4-6 hours. This calibration curve is then used to calibrate sample air measurements, putting the measurements on the

WMO X2007 scale. Thirty minute zero offsets are calculated using the interspersed individual Field standard measurements. Instrument dependent artefacts (e.g instrument temperature and flushing times) are accounted for in the processing code by calculating a linear fit of known Field standard concentrations and the parameter in question.

The Field standards and the target tank are filled at BHD and characterised at the NIWA GASLAB, Greta Point, Wellington, New Zealand. In preparing the Field standards mixtures are prepared to evenly span the typical air sample concentration range encountered, including elevated nocturnal levels (typical span of 380-450 ppm). The Field standard CO<sub>2</sub> concentrations are calibrated to the WMO X2007 scale, along with  $\delta^{13}\text{C-CO}_2$  (VPDB referenced to the WMO CCL scale) (Brailsford et al., 2012). Field standards require changing every 12-18 months. The target tank requires changing every 6-12 months as in parallel it also functions as a target tank for the FTIR trace gas analyser.

*The discussion about discrepancies between posterior fluxes and inventories seems unusually comprehensive, and of great value.*

Thank you for this comment; it is much appreciated.

*The discussion about the discrepancy between prior and posterior fluxes leads to the important remark that the Biome-BGC model has not been tested for New Zealand conditions, which is a subject which may deserve more emphasis than it gets now in the paper.*

We would like to clarify that although the Biome-BGC model has not been tested specifically for net ecosystem exchange in New Zealand, the model parameterization used here for managed grassland (sheep/beef and dairy pasture systems) has been calibrated for pasture production (or net primary productivity) under New Zealand conditions as described in section 4.1 (pages 9-11) and references therein. Keller et al. (2014) detail the method used to optimize model parameters using pasture growth data from 6 sites in New Zealand (3 sheep/beef and 3 dairy) as well as validation of the parameterization at an additional 22 sites (sheep/beef) and a comparison of model output to national milk production data (dairy). In addition, as mentioned at the top of page 11, modelled live stem carbon for the default parameterization of the evergreen needle-leaf forest (ENF) biome has been checked against the New Zealand National Exotic Forest Description yield tables (*pinus radiata*; MPI 2012) and is in good general agreement at a regional level.

Several biomes – most notably, evergreen broadleaf forest or EBF – are indeed untested for New Zealand conditions. In contrast to managed grasslands and planted forests, these biomes are largely undisturbed primary or minimally disturbed secondary forests, and we judged that they were unlikely to diverge substantially from default parameterisations that have been tested globally, but not specifically for New Zealand ecosystems. This could add a significant amount of uncertainty to the priors. Given this, it is perhaps not surprising that the prior and posteriors differ greatly in areas where indigenous broadleaf forest dominates, such as Fiordland (noted on page 22 lines 18-22). We have added some text in section 4.1 to emphasize this fact:

Page 10 line 30 – page 11 line 6:

An uncertainty estimate is computed for the a priori CO<sub>2</sub> flux from each grid cell. Based on Keller et al. (2014) and personal communication with the authors, we assign a 10% uncertainty for pasture fluxes. For forests, we assign 10% everywhere except in the Canterbury and Otago regions in the South Island, where 56% and 36% are used, respectively. These are conservative estimates based on a comparison of the Biome-BGC ENF modelled live stem carbon with the national exotic forest regional yield tables (MPI, 2012). The Canterbury and Otago regions were assigned larger uncertainties to reflect the larger discrepancy between the Biome-BGC model and the yields in these regions. The uncertainty is taken into account by the Bayesian optimization (Section 5). We note that the EBF biome has not been calibrated or tested under New Zealand conditions and might contain additional uncertainty.

### *Specific comments*

*Page 5, lines 24-27: It is a bit odd that the observation time (with respect to the mean*

*solar time) differs between summer and winter ! To my knowledge, this is unusual. Can it cause a bias in the annual course of the fluxes ?*

The choice to align the observation times with summer/winter time in New Zealand was based on the observation that gas inlets at varying heights at Lauder showed the least deviations from one another during the 15:00-16:00 local time window. This is indicative of a well-mixed atmospheric boundary layer that can be confidently modelled (the NZLAM model can not properly resolve vertical processes at the meter-scale corresponding to the height difference of inlets). Later on, as we additionally incorporated observations from the 13:00-14:00 time window, this reasoning became less important. Conditions are generally a bit less well-mixed at those times, and a one hour shift had little influence. In order to have a consistent setup for both time slots, we decided to stick to the local time windows.

In principle, this could cause shifts in the simulated fluxes around the transition between summer and winter times, however, such shifts are not visible in the results. In addition, a comparison for both time slots reveals that, for almost every day, the footprints are indistinguishable by visual inspection. Since the time slots are two hours apart, it appears very unlikely that a shift of one hour could introduce any significant bias.

*Page 10, lines 23-25: crops cover a small area, but does this imply that their contribution is small ? They might still contribute at certain times if their flux density is high.*

It is true that cropland could contribute over-proportionally at certain times. For all but one region (South Island east, region index 12) the fraction of cropland area to total area is less than 1.7%, so that the cropland per-area flux density would have to be unrealistically large to be comparable to the contributions of the other biomes. In region 12, the area fraction is 8.7%, making it more likely for the inversion to be influenced by cropland fluxes. The prior flux is not a strong constraint in that region (prior uncertainty is around 100 Mt CO<sub>2</sub> yr<sup>-1</sup> for the weekly fluxes) and the area is well sampled by the observing network (Figure 9). Thus, a strong signal from cropland in region 12 is likely to be accurately detected by the inverse method without substantial bias from the prior uncertainty.

*Page 11, line 28: Are the fossil fuel emissions taken time-independent within the years ? Emissions from heating etc. depends on the season.*

Yes, the fossil fuel emissions are constant throughout the 2011-2013 period. As we describe in section 4.3, we used the annual emissions available from the EDGAR v4.2 dataset to extrapolate emissions for the years 2011-2013. While the EDGAR dataset is well suited to be used in a study like ours, it does not include intra-annual variations in emissions.

The influence of fossil fuel emissions is small at Baring Head and negligible at Lauder relative to the contribution from the terrestrial biosphere (Figure 7). This is because New Zealand is a sparsely populated country, with a population density of 15 people per square kilometre. Auckland, New Zealand's only major city and home to over a third of New Zealand's 4.2 million people, is not well sampled by our current observing network (Figure 9). Thus we consider it unlikely that the inverse estimates are substantially influenced by the lack of seasonal cycle in the fossil fuel emissions.

*Page 16, lines 11-12 (and also page 18, lines 16-17): Does this mean that the time-dependency of the fluxes within the week is neglected ? If so, wouldn't this lead to systematic errors (of the kind of rectifier errors or something like that) ? If not, where is the time-dependency described ? This is an important question.*

Yes, both the terrestrial and oceanic fluxes are based on flux maps from the Biome-BGC and Takahashi datasets that are available at monthly resolution (described in sections 4.1 and 4.2). They are interpolated to weekly maps, which are then integrated over the region areas and used as the weekly prior flux estimates. The combination of weekly flux resolution for 25 regions with twice-daily observations from two stations ensures that the Bayesian computation is sufficiently constrained by the observations, i.e. there are more observations than unknowns. With our approach, it is not feasible to estimate regional fluxes at daily, or even hourly, resolution.

While not of concern for oceanic fluxes, for terrestrial fluxes this could lead to biases due to the strong diurnal cycle exhibited by the terrestrial biosphere. These biases should be strongest near the stations where their sensitivity is greatest. The region layout described in section 5.2 includes small regions around each station to contain all local effects that could otherwise be attributed to larger regions further upwind – this was partly done with the diurnal cycle in mind. We also include a sensitivity case (section 5.4) where we change the prescribed within-region flux pattern, because the inversion’s interpretation of a sudden flux peak not resolvable at the weekly scale is sensitive to these patterns. As reported in the paper, we did not find a bias in that sensitivity case strong enough to interfere with the conclusions.

However, in response to this comment and to the main comment of referee #2, we conducted an additional synthetic experiment where we explicitly compare the potential bias arising from the fact that the terrestrial diurnal cycle is not resolved. We report the details as part of our response to referee #2’s comment.

*Page 19, line 2: “We excluded the ocean prior”: How is this done exactly ? The description is unclear.*

This is done by applying an uncertainty of  $10^8$  Tg CO<sub>2</sub> yr<sup>-1</sup> to the regional prior fluxes, such that the prior estimate has a negligible effect on the inverse estimates. To choose this value, we first ramped up prior uncertainties until no further changes in the posterior estimation were obtained (around 1000 Tg CO<sub>2</sub> yr<sup>-1</sup>), then added 5 more orders of magnitude. We did not choose even higher values to avoid losing computational accuracy when dividing by those values during the inversion procedure.

We have added some text in section 5.4 to clarify:

(iii) Estimates of terrestrial CO<sub>2</sub> fluxes in New Zealand are influenced by the ocean flux prior through atmospheric transport. After entering the model domain at baseline levels, the air travels inevitably over a large stretch of ocean and will arrive at the New Zealand coast carrying an oceanic signal in its CO<sub>2</sub> concentration. Errors in the *a posteriori* ocean flux estimates will be interpreted by the inversion as terrestrial CO<sub>2</sub> flux. In a sensitivity test, we excluded the ocean prior to isolate its impact on the results. In order to accomplish this, the oceanic prior uncertainty was raised to  $10^8$  Tg CO<sub>2</sub> yr<sup>-1</sup>.

*Page 19, lines 4-29: This text is so long that it would be logical to make a separate numbered subsection of it.*

The intended structure of section 6 is such that we give a concise overview of the outcomes of the analyses, before diving into a bit more detail in the site-specific subsections 6.1 and 6.2. We clarified this in the text:

Generally, CO<sub>2</sub> measurements at BHD are most sensitive to sinks and sources in the Southern Ocean (south of 55°S), the Tasman Sea and the South Island. Australia and the North Island influence BHD CO<sub>2</sub> to a lesser extent. Observations at LAU are strongly influenced by local to regional terrestrial sinks and sources of CO<sub>2</sub>, enabling the station to see air from a large portion of the southern South Island. Further site-specific details are given in the subsections below.

*Page 26, line 1-3: Add more about the background of these findings.*

We cite recent studies finding a large difference in soil carbon cycling on hilly vs. flat pastures to help explain part of the reason that the NIR estimates differ from our study. They are also used as an example to highlight the large uncertainties that exist due to up-scaling estimates based on a limited number of sampling sites. Since this is only an example (we do not use their values in any computation), and keeping in mind that section 7.3 is already rather lengthy, we find it preferable not to elaborate further here. We have emphasized this in the text:

For example, a recent analysis of all sites available nationally suggests that sites on flat pasture are losing soil carbon at rates of  $\sim 170$  g CO<sub>2</sub> m<sup>-2</sup> yr<sup>-1</sup>, while sites in hill country are gaining  $\sim 770$  g CO<sub>2</sub> m<sup>-2</sup> yr<sup>-1</sup> (Schipper et al., 2014).



Page 26, lines 21-23: Unclear piece.

The intention of the text in question was to summarize some of the discussions in section 7.3. Due to being unclear and also repetitive, we have removed it.

Page 27, lines 24-25: Does this hold for all regions ?

Yes it does, all regional error correlations were included in the analysis. We have clarified this in the text:

An analysis of all regional error correlations reveals that both negative and positive correlations are present, however, only 0.13% of all pairwise correlations have an absolute value greater than 0.1. Very few values are smaller than -0.4 or greater than 0.2, with the negative extreme around -0.7 and the positive extreme around 0.3. Hence, with the available data, the inversion appears able to resolve weekly fluxes at the regional level chosen.

Page 28, lines 9-12: I don't understand this. It would seem that with a deeper PBL, the diurnal course in CO<sub>2</sub> concentration would be smaller, hence afternoon concentration would be higher. Or does neglecting of the diurnal course of the flux play a role here ?

We agree that the description was not very clear, as potential difficulties of modelling PBL depth during summer afternoons couples to the diurnal flux cycle, which is not resolved in our study. We discuss this in more detail as part of our response to referee #2's comment concerning the diurnal cycle.

Page 29 end-30 begin: A fuller explanation is found on page 22, line 20, and I suggest to include this also here because it is important for anyone doing research with the biome model. I would also recommend to mention it in the abstract.

We have added text in the conclusions (page 30) to emphasize that we are comparing our estimates to Biome-BGC's EBF category:

Regions covered predominantly by indigenous forest appear to have more pronounced photosynthetic and respiratory activity than suggested by the land model's evergreen broadleaf forest (EBF) category.

To keep the abstract concise, we abstained from adding the information there also.

Page 44, Table 1: (1) The division into north/south and east/west is not shown in the figures; (2) Only posterior results are given here, it might be interesting to show priors too.

In Fig 10, the region indices making up each aggregate region are given in parentheses underneath the aggregated region's name. Together with Fig 6, this should give detailed information about the aggregated regional outlines. We clarified this in the caption of Fig 10:

**Figure 10.** Weekly CO<sub>2</sub> fluxes in 2011-2013 from selected regions, in Tg CO<sub>2</sub> yr<sup>-1</sup>. Prior flux estimates are shown in gray, and the inversion results are shown in blue. Shaded areas represent flux uncertainty (1s). The cyan shade represents the extra uncertainty obtained from the sensitivity cases. Note that there is a one-off change in scale of the flux axis for sub-island scale regions. A positive flux indicates a net release of CO<sub>2</sub> to the atmosphere, while a negative value indicates uptake by the land biosphere. Regional indices in parentheses correspond to Figure 6.

Small corrections

Page 17, line 14: instead of "equivalent" I would use "similar" as "equivalent" is a very

*strong term in mathematics.*

*Page 25, line 22: add comma after “eddy-covariance”.*

*Page 44, Table 1: “parantheses” should be “parentheses”.*

Thank you. We have made the changes above.

*Page 50, figure 8: I don't understand the interior legend for the black color (it seems to pertain to Australia).*

We apologize for using a rather informal legend for Australia, and have replaced it with “AUS”.

*Page 53, figure 11: “per area fluxes”: I would prefer “flux densities” (also page 24, line 2).*

While perhaps less elegant, we prefer to keep the current phrasing for it not to be confused with densities in a 3-dimensional volume.

## Anonymous Referee #2 – Interactive Comment

*The paper "Atmospheric CO<sub>2</sub> observations and models suggest strong carbon uptake by forests in New Zealand" describes a regional atmospheric inverse modeling framework for the estimate of the weekly to annual mean CO<sub>2</sub> land ecosystem fluxes in New Zealand. It evaluates the results using comparisons to estimates from the national inventory.*

*- General comments*

*The scope of the manuscript, the atmospheric measurements, the modeling and inversion frameworks as well as the detailed discussion on the comparison between the inversion results and the inventory should, in principle, make this study worth a publication in ACP.*

*However, there is likely a critical issue regarding the lack of account for the diurnal cycle of the CO<sub>2</sub> land natural fluxes both in the prior estimate of these fluxes and during the inversion. The authors need to demonstrate that the impact of this lack of account is not problematic, clarify that they had actually accounted for this if it was the case, or should run new experiments to account for this (see my main comment A)). Furthermore, some analysis are rather weak and the quality of the text critically needs to be improved.*

We appreciate the referee's feedback about biases that might be introduced by our model's inability to resolve the diurnal cycle of the CO<sub>2</sub> land natural fluxes.

In order to address the referee's concerns, we designed and ran new experiments. Hourly CO<sub>2</sub> land fluxes were estimated based on a simple reconstruction of diurnally-varying NEP from Biome-BGC and combined with the NAME model to construct a synthetic data set that includes diurnal variability in the fluxes. Then, we used our current inversion framework, which neglects diurnal variability, to estimate the fluxes from this synthetic dataset. Biases from the diurnal cycle will then lead to differences between the known fluxes used to generate the synthetic data and the *a posteriori* flux estimates.

For the regions in the South Island, the results indicate that the lack of account for a diurnal cycle in the control run is not problematic in the context of the conclusions of this study. Weekly



and annual-mean biases do occur in some regions, but they are generally smaller than our posterior uncertainty estimates. Further, this experiment does not reveal any systematic biases towards more uptake across all or land regions.

Details follow in the context of main comment A) and will be incorporated into the manuscript.

We have worked to clarify and/or strengthen aspects of the analysis, wherever the referee suggested as part of their specific comments below. Similarly, we sought to improve the quality of the text in places specifically pointed out by the referee.

*Mainly*

*A) The actual temporal resolution of the prior estimate of the CO<sub>2</sub> land natural fluxes is 1 month. The inversion adjusts 1-week mean fluxes. From my understanding, there is thus no account for the diurnal cycle of these fluxes both in the experimental framework nor in the analysis and discussions of the text. This can be a critical issue given that the system assimilates afternoon data only, and given that, due to the configuration of New Zealand, these data should be primarily influenced by the afternoon, and, to a lesser extent, morning fluxes. By ignoring the diurnal cycle of the CO<sub>2</sub> land natural fluxes, the prior would underestimate the natural sink during the afternoon. Consequently, the assimilation of data during the afternoon only would lead to a strong increase of the afternoon sink, which, due to aggregation errors, can be artificially extrapolated into a abnormally high increase of the weekly to annual mean sinks and of the seasonal cycle. Since this is exactly what is observed in the inversion results, this can strongly weaken the confidence in these results. An annual sink of 0.1PgC for NZ is a bit surprising so the authors will definitely need to better support such a number. If the authors actually accounted for this, they should clarify it. If not, they should investigate it and it may be necessary for them to rerun the inversion by separating the adjustments for nighttime and daytime fluxes.*

We agree that the lack of a diurnal cycle within the inversion framework could lead to biases as described by the referee. In our original submission, we had already made an attempt to minimize this issue by explicitly separating small local regions around each station. Any potential bias caused by an increased afternoon sink in summer should be most pronounced near the stations, because the further away we go, the more the flux signals are integrated across hours and days. This bias of increased weekly sinks in summer should therefore be most prominent in those local regions, but is in fact not observed there. Furthermore, the reference inversion does not only show an enhanced summer sink compared to the prior but also enhanced emissions in winter, when the diurnal effect is much weaker.

However, we acknowledge the importance of this comment and have investigated the issue more thoroughly by designing a synthetic data experiment to explicitly compare inversion results to a synthetic “truth” that contains a diurnal cycle. To this end, we prepared hourly prior fluxes by imposing a simplified diurnal cycle on daily, gridded Biome-BGC outputs of GPP, NPP and HR. The diurnal variation in GPP is based on hourly solar insolation, and HR is assumed to occur at a constant rate throughout the day. While this greatly simplifies and exaggerates actual diurnal variation (e.g., it lacks factors that decrease the amplitude of the cycle, such as temperature dependence of respiration or down-regulation of photosynthesis under hot/dry conditions), for the purpose of our experiment it is sufficient to reveal model biases. The analysis covers one year, 2012. We then conducted additional NAME runs over the year 2012 and stored hourly footprints for BHD and LAU for the 15:00-16:00 LT time slot (the most relevant for the afternoon sink issue). These could then be used to translate the hourly prior into synthetic data for the 15:00-16:00 LT time slot. These data were used in an inversion with largely the same setup (data uncertainty, ocean prior, land prior was adapted – see details below) as the reference inversion and weekly posterior flux estimates compared to the true fluxes, i.e. the weekly averages of the hourly prior flux from Biome-BGC.

The figure below, which we included in the revised manuscript, shows the deviation of the posterior estimates from the truth (posterior minus true fluxes). In the revised manuscript, we discuss the results and conclude that the lack of a diurnal cycle is not problematic in most regions, unless they are already severely under-constrained (northern North Island). While in some regions the expected bias of increased weekly or annual sinks in summer is visible, it is contained in the uncertainty envelope. In other regions, and surprisingly this includes the two local regions where the diurnal bias should be most pronounced, we actually find a slightly

suppressed sink along with no discernible seasonal pattern. We added this discussion with more details to the “uncertainties and biases” section 7.4 in the context of the observed model-data mismatch for the 15:00-16:00 time slot, where we also discuss possible issues caused by misrepresented boundary layer dynamics:

In an attempt to explain this mismatch, we looked at two possible sources of bias: 1) a misrepresentation of the planetary boundary layer (PBL) depth in the NZLAM model, and 2) diurnal variability in the fluxes that is not captured because we use afternoon data only and do not have diurnal variability in our a priori fluxes.

1) At a site like LAU, strong solar radiation during a clear summer day might lead to a sudden deepening of the PBL in the afternoon between the two release periods, which could prove difficult for NZLAM to model accurately. Consequently, if the modelled PBL is deeper than in reality, any signal from surface fluxes would be mixed in a larger volume of air and their effect on modelled CO<sub>2</sub> concentrations would be attenuated. This would require the inversion to estimate stronger surface fluxes in order to explain measured CO<sub>2</sub> concentrations. This would lead to an overestimation of CO<sub>2</sub> uptake during summer. The opposite is true if the modelled PBL is too shallow and the measured concentrations can be explained with less CO<sub>2</sub> uptake. We compared the model PBL depth at 15:00-16:00 to radiosonde measurements made at LAU (Figure 13). The Heffter method (Heffter, 1980) was used to compute PBL height from the radiosonde data. The comparison suggests that the boundary layer is too shallow in the model during summer, thus enhancing the effect of CO<sub>2</sub> uptake on the modelled concentrations. Thus, smaller fluxes should be required to match the uptake signals observed at LAU, and therefore this process does not explain the observed mismatch. An equivalent analysis with the 13:00-14:00 LT PBL data suggests a similar discrepancy, yet these data can be explained by the inversion, further reducing the likelihood of this process being the cause of the observed mismatch. However, this analysis has caveats, because the radiosonde dataset is preliminary, and only few measurements were taken during the right times of day (13:00-14:00 LT and 15:00-16:00 LT, respectively).

2) Our method estimates surface fluxes on a weekly scale based on afternoon measurements and does not resolve the diurnal cycle of the CO<sub>2</sub> land natural fluxes. The diurnal cycle is particularly pronounced in summer, with strong uptake during the afternoon. This could cause the inversion to overestimate the weekly sink and thus bias the annual sink towards more uptake, in an attempt to match the low afternoon observations that are being assimilated. This issue is of most concern near the stations, because varying atmospheric transport integrates flux signals from more distant regions across a larger range of times. We would therefore expect this effect to be most pronounced in the local region surrounding each station. However, based on a synthetic data experiment described below, we find that this is not the case; the sink in the two local regions is actually slightly suppressed and does not reveal any discernible seasonal pattern.

We conducted a synthetic data experiment in order to assess the potential bias caused by diurnal variations not represented in our inversion framework. A synthetic dataset that included the atmospheric signature of diurnal variability was generated using hourly footprints from the transport model (instead of the 4-day mean footprints described in section 3.1) together with hourly Biome-BGC flux maps for 2012. These flux maps were prepared by imposing a simplified diurnal cycle on daily, gridded Biome-BGC outputs of GPP, NPP and HR. The diurnal variation in GPP is based on hourly solar insolation, and HR is assumed to occur at a constant rate throughout the day. Synthetic CO<sub>2</sub> concentrations were created for every day at 15:00-16:00 LT by propagating the hourly fluxes through the hourly model. This set of synthetic mole fractions was then assimilated in an inversion analogous to the reference inversion, whereby oceanic prior fluxes, fossil emissions, and the data uncertainties were kept the same as in the reference case. The weekly averages of the hourly fluxes then represent the “truth” against which the posterior fluxes can be compared. The weekly averages of the true fluxes are also used as a prior in the inversion, albeit with an uncertainty twice as large as in the reference inversion, to limit its influence on the results.

Unrepresented diurnal variability led to biases in the annual mean flux estimates for some regions in our inversion, but these errors were much smaller than our uncertainty estimates for most regions (Figure 14). Importantly, this experiment does not reveal a substantial systematic bias in the annual mean across all regions. Almost all weekly sink estimates agree within their uncertainty, including all but two weeks in region 10. Regions 12 and 15 exhibit a less coherent picture with an increased sink late in the year (as part of the 2012/2013 summer) but a smaller

sink early in the year (as part of the 2011/2012 summer). Interestingly, as two of the best constrained regions (upwind of LAU during average wind conditions), regions 13 and 14 show a suppressed, rather than overestimated, annual mean sink and without a distinctive seasonal pattern. Especially in region 14, the local region around the LAU station where the effect should be strongest, this is surprising and seems to indicate that a diurnal bias is unlikely to be the cause of the observed 15:00-16:00 data mismatch. Adding to this, the other local region (around BHD, region 8) does not show any distinctive bias for both weekly and annual sinks. Overall, the annual mean land sink in the South Island is overestimated by  $3.5 \text{ Tg CO}_2 \text{ yr}^{-1}$ , which is well within the uncertainty envelope of the reference inversion (Table 1).

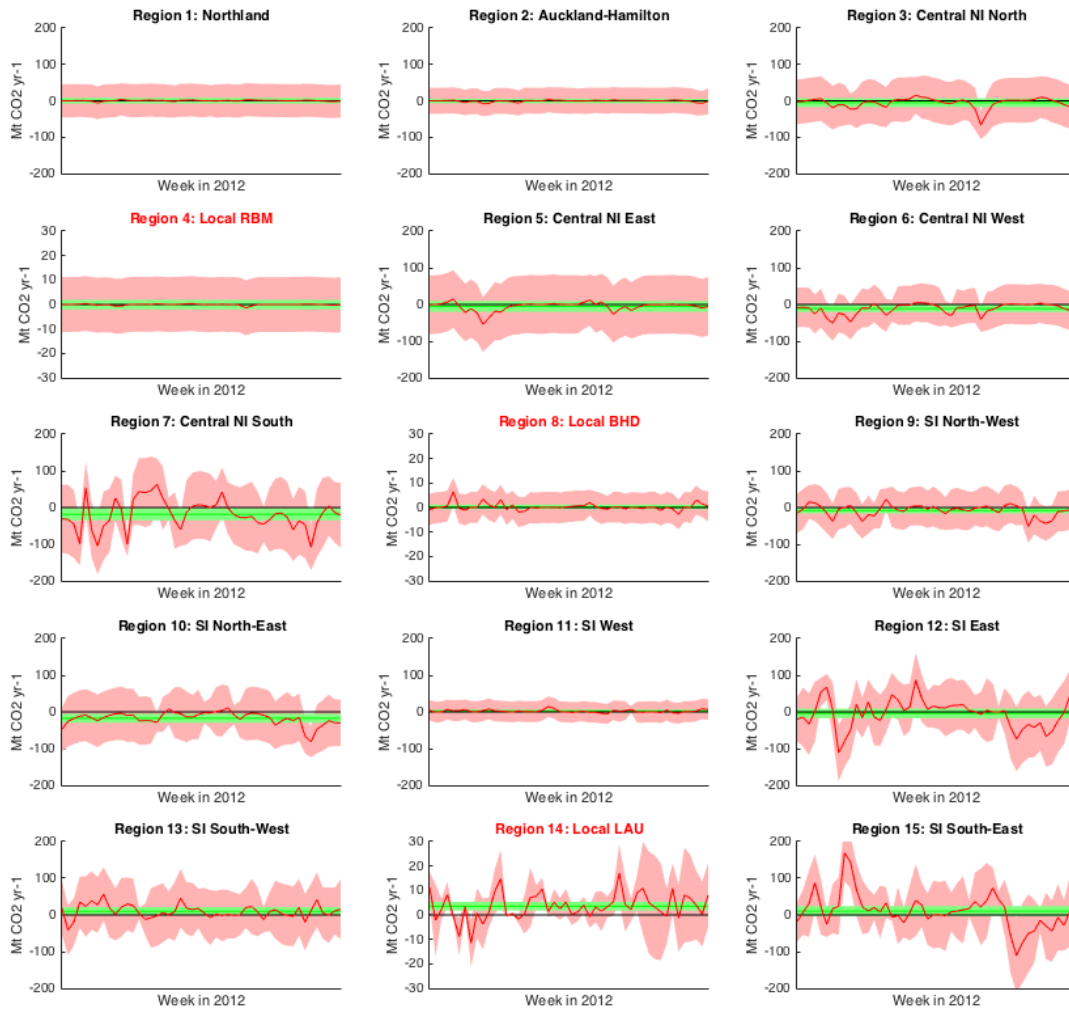

**Figure 1.** Deviation of the posterior flux from the “true” flux (red lines) in the synthetic data experiment with a diurnal flux cycle for the 15 land regions in 2012. Patched areas give the posterior uncertainty. Green bands represent the annual mean deviation, with their thickness corresponding to the annual uncertainty. Note there is a change in scale of the flux axis for the three local regions (red font).

*This problem of the lack of account for the diurnal cycle of the CO<sub>2</sub> natural fluxes can be connected to the lack of account for past CO<sub>2</sub> regional inverse modeling studies in the introduction and method sections (see my major comment on the introduction: the paper seem to rely on techniques and knowledge from CH<sub>4</sub> inverse modeling experiments, ignoring the potential specificities of the inverse modeling applied to regional CO<sub>2</sub> natural flux estimation). In this context, the text at lines 16-20p18 is really embarrassing (in addition to being very confusing).*

We would like to clarify that the inclusion of studies concerning other greenhouse gases in the introduction and method sections is due to similarities in the models used, i.e., NAME and/or regional versions of the UK MetOffice’s UM. Data handling, baseline analysis and inversion specifics are quite different from those studies, as pointed out in the manuscript.

We have added references to additional studies dedicated to regional CO<sub>2</sub> inversions in the introduction of our revised manuscript, to address this point and another one below. However,

most regional CO<sub>2</sub> inversions have been developed for the Northern Hemisphere, mostly covering Europe or North America. Characteristics such as dense observing networks allow for a different treatment of key aspects of the inversion (e.g., the treatment of background CO<sub>2</sub>), which are not feasible in New Zealand, lessening the similarities to those studies somewhat.

We have edited the text at p18 116-20 so that a generic flux pulse is no longer discussed (even though the diurnal cycle can be described as a series of flux pulses). Rather, the focus is now on the within-region flux pattern, while the discussion of the diurnal cycle has been moved into section 7.4 in response to comment A).

The geographic distribution of the CO<sub>2</sub> fluxes is fixed within each region. This can lead to biases in the estimated flux if the region is being unevenly sampled. That is, if a specific observation is sensitive to only a small area inside the region, then the flux estimate for the entire region will be biased towards that area, which may not be representative for the region.

*B) The logic, order and rigor of the text needs to be strongly improved; it would be difficult to detail all the issues corresponding to this comment but I try to list some representative examples below. The order of the figures is not consistent with that of the references to these figures in the text and it often looks like random.*

*I also think that there is a significant mistake regarding the mathematical framework and configuration of the inversion since I believe that the chi-test that has been used to set up the model errors is wrong. This should have been  $2J/n$  where  $n$  is nobs the number of obs and not nobs-nflux (the authors seem to have confused the chi test for  $J$  and that for "Jobs" i.e. the part of  $J$  corresponding to the misfits to the obs). I assume that this comes from the fact the authors were confused about the type of cost functions analyzed in the ref (Gurney et al 2004 and Baker et al 2006) that they provide for this test. In any case, the way this test is presented is confusing and lacks of rigor.*

Thank you for catching the inconsistent ordering of the figures (which was due to changes being made to the references to some figures without updating their order of appearance). We have changed the order of the figures such that they are now in line with their references in the text.

We agree with the referee on the chi-squared test. Our intention was to write  $n=nobs+nflux-nflux$ , to reflect the test is indeed for  $J$  and not for Jobs. Unfortunately, the  $+nflux$  term was forgotten. However, the computation of the test has always been correct in the inversion scripts. We corrected the description in the text in section 5.3.

The reduced chi-squared statistic  $\chi^2=2J/n$  is used to assess the fit of the inverse model to the observations (other examples of how this statistic can be used are described in, e.g., Gurney et al., 2004; Baker et al., 2006), where  $n$  is the number of observations.

The references mentioned were chosen because they are some of the few that explicitly mention that they have done a reduced chi-squared test, not because we have simply copied their formulas.

*C) The different focuses of the text could be better balanced. In particular the evaluation of the inversion is a bit short while there is much material on the footprints of the measurements that is not really exploited for such an evaluation. The skill of the transport model for simulating the concentration at the measurements sites is hardly analyzed even though the topography seems quite complex around the sites and the measurements are taken at 10magl only.*

We have worked to condense appendix A as part of our response to referee #1. As noted in our response to that referee, much of this material has not been previously reported elsewhere, and therefore it is essential to provide many of the details in order for readers to evaluate the work.

While we use only measurements from the 10m inlets, we did comparisons with data from other heights (e.g., 6m at Lauder) during periods when both are available. For the time slots in this paper (13:00-14:00 and especially 15:00-16:00) there are only small differences, which led to their selection, as described in section 2. While a more in depth analysis of transport model

bias is outside the scope of this paper, recent modelling developments will allow us to explore the impact of using a higher resolution (1.5 km<sup>2</sup>) version of the model in the near future. A detailed study of the impact of the transport model with a focus on topography will be the subject of a future manuscript.

*D) I feel that there is sometimes a sort of over-confidence in the concept of baseline and in that of constraining the fluxes of different regions using the different measurements sites independently (while a traditional concept of the atmospheric inversion is to exploit gradients between sites to infer fluxes between these sites), and I think that it should be better discussed and weighted when analyzing the results. The idea of a very slowly varying baseline concentration applying to a very large portion of the model boundaries (the background sectors) may often be unadapted. I do not contest the use of such a concept to solve for the boundary conditions in this study since these conditions are difficult to deal with and this practical solution is among the relevant ones. But the paper could better discuss it and more carefully analyze it in the CO<sub>2</sub> data timeseries. CO<sub>2</sub> simulations over large domains at high resolution (e.g. <https://www.youtube.com/watch?v=x1SgmFa0r04>) indicate that synoptic patterns of CO<sub>2</sub> can travel over large distances which hamper the concept of baseline. In particular, the influence of CO<sub>2</sub> sources and sinks in Australia (not that of the portion included in the domain only) could generate large variations in the concentrations measured in New Zealand at synoptic scales even though it is at more than 2000km from New Zealand. In principle, regional inversion frameworks using dense networks where, for most of the wind directions, parts of the measurement sites are located downwind some of the other sites (with the targeted fluxes located in between) limit the impact of uncertainties in the boundary conditions to the margins of the observation network. However, here, the network seems to have been deliberately set up so that the stations work independently to target different areas of New Zealand (and the text on p3 l. 20 only sees the use of several stations as an "advantage").*

At the time of our study, there were two stations in New Zealand where CO<sub>2</sub> concentrations are measured *in situ*: Baring Head and Lauder. As described in section 2.1 and 2.2, the data retrieval and processing procedures are very similar between the stations and regular, detailed comparisons are undertaken to ensure that measurements are comparable (as detailed in Brailsford, 2012). In this context, our "setup of the observational network" simply means that we have selected every station that can contribute to inform an inversion for our region.

We agree that a denser network of stations would be advantageous, and we are working to expand our national observing network. However, previous regional inversion studies have demonstrated that it is still possible with a single station to develop a regional inversion, as has been done, for example, for Mace Head, to put constraints on GHG budgets for the whole of Great Britain (e.g., Manning et al., 2011).

We have added text to section 5.1 to clarify some caveats about the baseline uncertainty:

A caveat of this concept of baseline is that synoptic patterns of CO<sub>2</sub> can travel over large distances and cause variations in the background concentrations at the regional boundary, which are not accounted for by the baseline formed here. Given New Zealand's geographic isolation and location in the Southern Hemisphere, the strength of synoptic variations is limited compared to regions in, e.g., Europe or North America. While an explicit treatment of synoptic variability is beyond the scope of this study, a sensitivity experiment is described in section 5.4 to address potential biases in the baseline.

Due to the configuration of New Zealand and the orientation of these stations with the average south-westerly winds, Baring Head is located downwind of Lauder for about 25% of the time (based on the southwesterly cluster in Figure 4) and Lauder is practically never downwind of Baring Head. It is therefore difficult to base an inversion on inter-station CO<sub>2</sub> gradients only, or to mitigate the influence of synoptic variations along the boundary. When we set up the inversion, we considered two ways to describe CO<sub>2</sub> concentrations and variations along the boundary: using modelled CO<sub>2</sub> based on global inversions, or constructing a baseline. We selected the second option to facilitate a more data-driven approach and because the southern baseline based on the clean air sector at Baring Head was already well studied and established. The northern component of our baseline is less well established, but also plays a significantly deweighted role in the construction of the weighted baseline. In this context, our



sensitivity test for a baseline bias is to ensure some degree of robustness of estimated fluxes. Of course, while driven more directly by observations, our baseline cannot reflect synoptic influences accurately. However, while synoptic patterns can travel large distances, their strength is much reduced between Australia and New Zealand when compared to the Northern Hemisphere, e.g., the North Atlantic, as is also evident in the video link provided by the referee.

*The paper considers a baseline uncertainty whose exact computation is quite impossible to understand in the main text (I20-21p13) and in appendix B (B1 does not mention any estimate of uncertainties for the southern baseline, B2 is quite confusing). It is difficult to understand what the authors aim at characterizing with this uncertainty. However, some statistics on the timeseries analyzed for such a computation could help to assess the robustness of the baseline concept. The test of sensitivity to a 0.1ppm bias in the baseline ((i) page 18) does not evaluate the weakness of the concept of baseline that I discuss here as illustrated by the solutions proposed in conclusion for tackling such a bias.*

We have added text in B.1 to clarify the computation of the uncertainty of the southern baseline component:

The remainder time series, which is the difference between the monthly record and the sum of the seasonal and trend components from the STL analysis, is used as uncertainty estimate for the southern baseline.

This should also make the computation of the uncertainty of the southern baseline component more clear in B.2.

*The study could better characterize whether there could be some weeks or month when results could be less robust due to the influence of fluxes from Australia or from other areas (e.g. by comparing the filtered baseline to the actual measurements when the sensitivity to New Zealand fluxes is relatively low, or when large winds blow from a background sector; and by using the analysis of the footprint and the timeseries of the model-data misfits). All of this should be better introduced when presenting the technique (section 5 is often confusing), and better analyzed and discussed in the result and discussion sections.*

The difference between the filtered southern baseline and the actual measurements during periods when the conditions for clean air are fulfilled is actually a direct part of the uncertainty of the baseline timeseries and as such directly influences the weight of the associated observations in the inversion. This was probably not described very clearly, but we believe it has become clear with the additions to appendix B discussed above.

We conducted an analysis to look specifically at the frequency of events when Australian fluxes can influence measured CO<sub>2</sub>. The analysis is described in section 5.2 and further discussed in section 6. Those events are rare, with a frequency of a few days (less than 10) per year. The analysis is based on fossil emissions and as such limited, but it gives an idea about the relative importance of Australian emissions versus emissions from New Zealand. Fossil emissions from New Zealand are much weaker than from Australia in absolute terms, but exert a stronger and much more continuous influence on the measurements, as seen in Figure 7.

- Major comments by section:

#### 1) Abstract

The authors could give some insights on the confidence in the inversion method and estimates; this would help better end this abstract (the present "but some differences are likely to remain" is a bit abrupt)

We have added text at the end of the abstract to point out the main sources of error:

Baseline uncertainty, model transport uncertainty and limited sensitivity to the northern half of the North Island are the main contributors to flux uncertainty.

## 2) Introduction (1)

At line 30-32, the authors discuss the development and application of regional atmospheric CO<sub>2</sub> inversions. However, they cite papers on CO<sub>2</sub> footprint modeling and inverse modeling for other species, but no paper on CO<sub>2</sub> regional inverse modeling even though there have been a lot of studies in this field since more than 5 years. Providing details at the end of page 3 on the papers by Stohl et al. (2009) and Manning et al. (2011), which had to deal with the estimate of sources with very different spatial and temporal patterns compared to the CO<sub>2</sub> natural fluxes, is a bit problematic (and one can hardly see the link between these detailed descriptions on page 3 and the specificities of this study on page 4). Therefore, the introduction presents the principle of regional inversion as a sort of generic algorithm that could be applied similarly to any GHG. And it gives a limited view on the range of techniques that have been used for regional atmospheric inversions. This is emphasized by the implicit assumption that the concept of "baseline" (in the way it is treated in this study) applies to all atmospheric regional inversion cases, while many regional systems, by using outputs from larger scale models to force their boundary conditions and/or by relying on the spatial gradients between measurement stations to limit their impact, give a different answer to the problem of solving for the influence of fluxes outside the modeling domain. Opposite to what is said at line 2 on page 3, the use of Lagrangian models is not a requirement for regional inversion. In general, the text which attempts at defining the regional inversions vs global inversion from page 2 to page 3 is a bit confusing and could have been more concise.

We have edited parts of the introduction to rebalance the studies discussing regional inversions of greenhouse gases other than CO<sub>2</sub> with those for CO<sub>2</sub>. In particular, we have added three references dedicated to regional CO<sub>2</sub> inversions: Gerbig et al. (2003), Matross et al. (2006) and Lauvaux et al. (2008).

To address those scales, regional atmospheric greenhouse gas inversions (Lin et al., 2003; Stohl et al., 2009; Bergamaschi et al., 2010; Manning et al., 2011), including CO<sub>2</sub> inversions (Gerbig et al., 2003; Matross et al., 2006; Lauvaux et al., 2008), have been developed and used to estimate the carbon budgets of regions like Europe and the USA as well as individual nations. A regional inversion can provide top-down CO<sub>2</sub> exchange estimates from atmospheric CO<sub>2</sub> measurements and transport model simulations that describe the source or sink regions influencing each measurement. They are complementary to bottom-up inventories and provide a means to verify national inventories.

In their inversion study, Stohl et al. (2009) estimate emissions for three HFC and HCFC greenhouse gases on national to global scales for 2005-2007. Their approach uses the FLEXPART Lagrangian model to describe the recent air history arriving at nine observation stations distributed globally. They use a priori emission maps and estimate both the baseline and the regional emissions as part of the inverse modeling. Manning et al. (2011) use 20 years of in situ CH<sub>4</sub> and N<sub>2</sub>O observations from a single station, Mace Head, on the west coast of Ireland. Mace Head regularly receives air from the midlatitude North Atlantic as well as from the UK and continental Europe, which allows them to estimate both the baseline and terrestrial emissions. Their emission estimates for the UK have been used to complement those reported to the UNFCCC for the period 1990-2007. Matross et al. (2006) derive regional-scale CO<sub>2</sub> flux estimates for summer 2004 in the northeast United States and southern Quebec using the STILT Lagrangian model in conjunction with aircraft and tower observations.

As mentioned in response to an earlier comment, we include a limited discussion of studies with regional inversions of other greenhouse gases, because they either use the same model or a similar procedure to establish the source-receptor relationship.

Lagrangian models are indeed not a prerequisite for a regional inversion, and we have edited the respective text as part of the changes made above.

## 3) Method sections (2-5)

The logical structure is often confusing. This regularly forces the authors to anticipate for the next sections and thus make redundancies (e.g. the inversion technique is introduced on p8 26-28 and at the beginning of sections 4 and 5.3). Presenting the general frame of the inversion (5.3) could help solve for it.



The logical structure is to first introduce the ingredients of the inversion (data, priors, model=source-data relationship, baseline), then piece it together in a formal framework in section 5. We considered putting the general frame 5.3 of the inversion in front, as suggested by the referee, but this would mean we have to anticipate the detailed information about the ingredients that only follow later.

The mathematical formalism should be based on rigorous notations. Presently, the vector  $x$  and matrix  $T$  describe completely different things between section 3.2 and section 5.3. The spatial distribution of the fluxes within a region, which is implicitly contained in matrix  $T$  in section 5.3, and not in the vector of the prior estimate of the regional budgets  $x_0$ , are called throughout the text "prior distributions". The prior uncertainties derived from scientific publications and objective comparisons (section 4.1 and then extrapolated in section 5.3 at the regional scale) seem to be smaller than the artificial "uncertainty component of 50% of the seasonal amplitude" added in section 5.3 (even though it is difficult to understand what 115-17p16 really mean). Therefore, the derivation of the prior uncertainties seems artificial. The introduction of the term with  $S$  in equation (2) raises questions. Why did not the authors rather introduce temporal correlations in the  $C_0$  matrix to limit the changes in the weekly variations of the fluxes ?

We thank the referee for picking up the inconsistent notations. We have changed the wording regarding  $x_0$  whenever a confusion regarding the within-region flux distribution and regionally integrated prior fluxes appeared likely. In the description of the transport matrix, we now distinguish between  $T_g$ , which links sources at the grid level to the observations, and  $T$ , which links the aggregated regional sources to the observations:

A transport matrix  $T_g$  (unit  $s\ m^{-1}$ ) is formed by dividing the dosage by the total emitted mass and multiplying by the area ( $m^2$ ) of each surface grid cell. Each element of  $T_g$  describes the atmospheric transport of a continuous emission of  $1\ g\ CO_2\ m^{-2}\ s^{-1}$  from a given grid cell over the previous 4 days and subsequent contribution to the air concentration at the receptor (BHD or LAU) during each 1 h period. With  $x$  being a vector containing all grid cells and  $c$  a vector containing the concentration (unit  $g\ CO_2\ m^{-3}$ ) for all 1 h periods, this is written as  $T_g x=c$ . Given  $T_g$  and the measured concentrations  $c$ , the inversion developed in this work solves for the  $CO_2$  fluxes  $x$  using a Bayesian optimisation, i.e., a statistical model that balances information from measurements with a priori knowledge about the fluxes (section 6).

Instead of solving on the grid scale, however, the fluxes in  $x$  are pre-aggregated into a set of regions (section 5.2) and a transport matrix  $T$  created by aggregating the grid cell in  $T_g$  to reflect the regions in  $x$ ,

$$Tx=c \tag{1}$$

In addition, a priori flux maps are taken into account for the terrestrial and oceanic portions of the domain (section 4).

The prior uncertainties for the regionally integrated land fluxes are generally larger than could be assumed from the reported uncertainties at the grid scale. As described in section 5.3, full spatial correlation is assumed during aggregation, in order to reflect that within-region flux patterns are fixed and cannot be changed by the inversion. The resulting regional uncertainties are mostly larger than the additional 50% of the seasonal amplitude, unless the prior flux is near zero, i.e., some time in spring or autumn. The additional uncertainty component thus ensures that the inversion can also adjust those near-neutral fluxes, which would otherwise be practically prescribed and would introduce artificial seasonal turning points that cannot be altered by the inversion. For the majority of weeks, the prior flux uncertainty is largely formed by the aggregated grid-scale uncertainty.

The  $S$  term in equation (2) is an alternative to introducing temporal correlations in the prior covariance matrix. It has the advantage of being very transparent, i.e., by explicitly prescribing a smoothing scale of  $5\ kg\ CO_2/m^2/yr$ , we know that if posterior flux estimates exhibit an uncertainty as large as this, then they are basically only constrained by the smoothing term and not by the observations.

The logic behind the specific choice and configuration of the sensitivity tests on page 18 is not really convincing and does not seem to tackle some of the most critical sources

of errors in the inversion. What is the link between the modeling in NAME (l4p18) and the details given on (ii) later in page 18, which concern the spatial distribution of the fluxes within the regions? Definitely, a practical assessment of the transport model uncertainties would have been interesting. I do not understand the test of sensitivity to the inclusion of the ocean fluxes in the modeling framework. What does l2p19 mean? How to connect it to l3p28? In principle, the impact of the uncertainty in these fluxes should be correctly accounted for in the reference test. The point maybe be about "biases" but it is difficult to guess, in this section and when analyzing the results, whether the authors systematically make a rigorous use of the term "bias".

The description "(ii) the modeling in NAME" was indeed confusing, and we have edited the text to reflect it is about the within-region flux distribution:

These include (i) the CO<sub>2</sub> baseline, (ii) the flux distribution within each region, and (iii) the ocean prior fluxes.

Sensitivity case (iii) investigates how sensitive the inversion results are towards the ocean prior. The ocean prior is based on a low-resolution pCO<sub>2</sub> climatology and, while further away than the land regions immediately surrounding the stations, still influences the measurements (particularly at Baring Head, as seen in figure 7), so that we think it is worthwhile to isolate its impact. We have clarified how the ocean prior is "removed" in the text (also as part of our response to referee #1):

In a sensitivity test, we excluded the ocean prior to isolate its impact on the results. For this, the oceanic prior uncertainty was raised to 10<sup>8</sup> Tg CO<sub>2</sub> yr<sup>-1</sup>.

#### 4) Result sections (7)

In general, the analysis are a too qualitative.

The robustness of the inversion needs to be better assessed through the analysis of the comparisons between prior and posterior CO<sub>2</sub> vs. measurements. I feel that relying on the sensitivity tests to state that the results are robusts (l20-21p1, l8p29) is not really satisfying given that the sensitivity tests do not really sample the most critical sources of errors in the inversion system. The first subsection of section 7 could have been dedicated to such a detailed analysis of the CO<sub>2</sub> concentration model - data misfits, providing an opportunity to exploit the long discussions on the station footprints to potentially correlate the highest misfits with specific transport conditions.

We have expanded the discussion of the model-data mismatch in section 7.4, also relating to main comment A) (we discuss the details there). The mismatch, especially at Lauder for the 15:00-16:00 LT time slot is now discussed in light of boundary layer dynamics as well as potential biases introduced by the lack of a diurnal cycle. We think that these components are the most likely causes behind the observed mismatch. Specific transport conditions could also have an impact, especially if there is a strong signal from Australia, but as discussed above, strong Australian signals are not very frequent whereas the observed mismatch in Figure 12 seems to be of a more continuous nature.

In order to ensure that the chi square statistics are right, the authors have to derive a 0.4ppm model error which is surprisingly low for 10magl stations surrounded by a complex topography, and which is strange given that the model data misfits often exceed the projection of the prior uncertainty in the obs space. As said in major comment B, I think that the authors made a wrong chi test but I also assume that this hardly explains such a low diagnostic of the model error. Figure 12 normalize the model data misfits by the prior uncertainty and the text hardly discusses absolute values (in ppm) of these misfits. These absolute values could reveal the skill of the model for simulating CO<sub>2</sub> at the measurement sites. At least, figure 12 reveals large biases (and errors with a high temporal correlation over several months) whose consequences for the confidence in the inversion results should be better weighted.

As detailed in our response to an earlier comment, the chi-squared test had been computed correctly, but was incorrectly documented, which we corrected.

The 0.4 ppm refer to a minimum error applied before the chi test. Based on the chi test, a

global factor of 2.9 is then applied. This information was missing in the text and we have edited the respective paragraph in section 5.3:

Data uncertainty is calculated as the quadrature sum of the baseline uncertainty (Section **Fehler! Verweisquelle konnte nicht gefunden werden.**) and the CO<sub>2</sub> data uncertainty (Section 2). A minimum uncertainty of 0.4 ppm is assumed to account for uncertainties in the inverse modeling system as well as possible errors in the fossil fuel emission estimates. The final uncertainty is multiplied by 2.9, a value based on a goodness of fit analysis of the inverse model (reduced chi-squared statistic, as described below). The final data uncertainty is taken as the root mean square (quadrature) of both components. The square of the uncertainty populates the main diagonal of the data covariance matrix  $C_d$ . We assume no correlations between pairs of data points, so all off-diagonal elements of  $C_d$  are set to zero.

We do not see the usefulness of presenting absolute values in Figure 12, as those can be adjusted heavily by the choice and balance of prior flux and data uncertainty. In the context of the chi test, the mismatch relative to the prior uncertainty is more meaningful.

The confidence in the inversion results at the weekly scale can also be weakened by the quite high week to week variations of the inverted weekly fluxes despite the term with the S matrix in equation 2. However, while the text takes time to discuss this penalty term in section 5.3, it skips the analysis of the week to week variations in the result sections. Does it lower the confidence in the monthly mean results or can it be explained by actual variations or through the variations of the observation constraint ?

It is true that the smoothing term could potentially weaken the confidence in the results. However, as discussed as part of our response to an earlier comment, our choice to use an explicit Gaussian smoother in the cost function over, e.g., temporal correlations, was based on its advantage in transparency. It will only considerably affect a particular flux estimate if the data or prior cannot constrain it to within 5 kg CO<sub>2</sub>/m<sup>2</sup>/yr, which is more than ten times larger than the largest prior flux from any grid cell. But it will nudge a flux estimate towards a smoother curve if there is little penalty, i.e., if two possible estimates come at roughly the same cost it will choose the smoother one. The posterior flux uncertainties are much smaller on a per-area scale than the value above, so we concluded that the smoother's effect is indeed limited to that nudging process.

One has to trust the authors that their inversion results can be directly compared to a sort of crude NIR total estimate in the abstract and in the introduction. However, the text in 7.3 reveals (even though it is often confusing) many differences between the type of fluxes covered by the inventory and the inversion, and that the inventory provide enough details to filter some major flux components that cannot be accounted for by the inversion, so that a more relevant budget could be derived for this comparison. Therefore, things should be presented differently (i.e. turned the other way around, starting with a presentation of the content of the NIR, and following with an extraction of a relevant budget from the NIR) and, in the abstract, "the sink [derived by the inversion]" should not be compared to "the reported 27 tGco2YR-1" (l. 26-27 p1) but to a more relevant combination of the NIR components.

We agree that the abstract could have been structured in the way suggested by the referee, by directly presenting a modified NIR estimate that we compare our estimate against. However, there is some merit in reporting the original NIR value, as it is more recognizable among the community. We would therefore like to keep the current structure where many flux components that could reconcile the two estimates are briefly presented in the abstract and then in much more detail in section 7.3.

##### 5) Conclusion (8)

Given all my concerns that are detailed above, I think that the discussion misses the critical needs for the improvement of the inversion in the last paragraphs, and that it is too optimistic regarding the results in the first paragraph and at l1-3p31.

We have added to the last paragraph in the conclusions to point out that there are significant uncertainties, mainly with regard to annual mean flux estimates:

The inversion methodology developed here is a powerful tool to validate net regional CO<sub>2</sub> sinks in the New Zealand national inventory report. It offers an independent, top-down view on the national carbon budget. The limited sensitivity to the northern half of the North Island, as well as baseline errors, can lead to large uncertainties for annual mean flux estimates in some regions. Improving on these factors in future studies can further increase the usefulness of the top-down approach.

- some questions

\* why do not the author assimilate 14:00-15:00 data ? in order to save computations ?

This is one reason, yes. Another reason is that the footprints for the 13:00-14:00 and 15:00-16:00 periods are highly correlated and visually almost indistinguishable from each other. It is likely that the 14:00-15:00 footprints would be, too. Therefore adding them would amount to essentially blowing up the transport matrix with equations that are not linearly independent and add little information. This would be similar to just averaging over all three data periods.

\* p6 l3 vs l7: it seems that this site should be strongly influenced by the emissions of Wellington. Can the authors provide more details (e.g. statistics) on this topic than at l23-24p20 ?

The influence is mostly reflected by the NZ fossil fuel contribution to the observed anomalies at BHD in Figure 7 (red bars). It is comparable in size to the ocean contribution. Contributions from other fossil hotspots, like Auckland, are seen at both stations and are quite small at most times as seen in the lower panel for LAU.

\* l31p11, l12p2, l12-16p24: if focusing on fossil fuel emissions, what is the difference between EDGAR and NIR ? can we assume that NIR has a far more precise estimate than EDGAR ?

We think it is likely that the NIR has a better estimate for fossil emissions in New Zealand. Originally, we intended to use their values, but it turned out that there are no mapped distributions of emissions available for the public. While the two estimates are slightly different at the national scale, we discuss this difference and its implications in section 7.3.

- Sample of minor issues illustrating some of the general comments above

\* the text often forgets to be precise about the fluxes that are discussed (l13p1-> natural, l.12 p2: CO<sub>2</sub> emissions -> anthropogenic accounting for land use or fossil fuel only ?; first sentence and line 13 of abstract and 1st paragraph page 4: precise that you target natural fluxes; l27p8: the system solves for natural fluxes; l2-3p9 sinks and sources: natural sinks and sources...); on the same topic, lines 12-14 p24: as it is, these sentences do not make sense since land use change emissions are not fossil fuel emissions.

The inversion solves for net CO<sub>2</sub> fluxes that contain anthropogenic and natural elements. This was already pointed out in the 2nd paragraph in section 5.3, but we have made it more clear by adding the word "net" in the abstract and the first sentence of section 5.3:

(abstract) This approach infers net air-sea and air-land CO<sub>2</sub> fluxes from measurement records, using back-trajectory simulations from the Numerical Atmospheric dispersion Modeling Environment (NAME) Lagrangian dispersion model, driven by meteorology from the New Zealand Limited Area Model (NZLAM) weather prediction model.

(section 5.3) The aim of the inverse method is to estimate a net CO<sub>2</sub> flux from every region and for every week between 2011 and 2013 using a Bayesian approach (Gurney et al., 2004; Tarantola, 2005; Steinkamp and Gruber, 2013).

\* discussing RBM in section 2 and 5.2 is a bit strange but the authors are embarrassed

with the fact that the partitioning of the fluxes accounts for the future inclusion of RBM data in the system for future experiments.

As explained in the manuscript, the RBM station was included in the design process for the inversion, to allow for direct comparisons between our results here and the results of future papers. Our mentioning of RBM in section 5.2 offers maximum transparency and insight of what we did.

\* examples of abusive shortcuts: l13 p1 (from measurement records), l16 p2 (locally present vegetation), p822-24, l7p17 (which quantity does this number corresponds to ? C is a cov matrix). . .

In the abstract and introduction we give a summary and brief introduction into what we studied, while all necessary details follow in their respective sections. We do not think repeating these details adds to the value of the manuscript.

We edited the text at l7p17 to clarify the presented number is squared before populating the covariance matrix:

The diagonal matrix  $C_s$  contains the squares of values representing the strength of the smoother.

\* examples of awkward and confusing sentences: l2-3p3, l10-11p3, all sentences from l14 to l21p3, l6p4, l23-24p9 (there is a long discussion on the biomes and land use maps on page 9 and 10 but we hardly understand how they will be used), the first paragraph of 5.1, "monthly standard deviations" l20p13, l4p15, l15-17p16, l20-21p16, l4-6p17, l10p17, l14-15p18, the whole paragraph (ii) on p18, l21p21, l12-14 p24, l20p24, l21-23p26, l22-25p27, l26-28p27... . .

Some of these examples refer to earlier comments and we are confident that we were able to clarify the text as part of our responses there.

The remark about the first paragraph of 5.1 seems to relate to the fourth paragraph of 5.1. There, we inform the reader briefly about what we did, but refer to appendix B for more details. As such, we do not think repeating those details at that point would be helpful.

\* l18p5: the link between the PBL and the horizontal extent of the footprint of the measurements is a bit confusing

We have added a reference to section 7.4 where this link is discussed in more detail.

\* the logic behind the model representativeness error computation is not obvious (p5l28-32), in principle, the STD of the concentration variability at the 5-min scale does not correspond to the skill of the model to represent hourly measurement averages; the assumption underlying this computation should be explained

We have edited the text to avoid the reader getting the impression we are trying to explicitly link the skill of the model to represent hourly measurement averages with the data variability at the 5-min scale:

This uncertainty is generally much greater than the measurement imprecision, as it reflects real atmospheric variability, and is instead intended to capture representativeness errors such as the measurement failing to represent the mean of a model box or the model failing to represent the specific conditions at an individual location.

As part of our response to an earlier comment we have also added additional information on data uncertainty in section 5.3.

\* p8 l8-11: the normalization (if I understand it correctly) does not make sense and just

loses information.

The normalization simplifies spatial integration and computation of regional responses. It does not lose information. The only information “lost“ is the integrated value over the whole domain, but this value is a direct result from the amount of CO<sub>2</sub> released in the NAME model and can be chosen freely without any effect on the inversion (see also section 3.2).

\* the text often forgets to associate numbers with a time or space scale (e.g. l31-32p10, 3rd paragraph of page 11, l7p24...)

We have clarified in the text in l31-32p10:

An uncertainty estimate is computed for the *a priori* CO<sub>2</sub> flux from each grid cell. Based on Keller et al. (2014) and personal communication with the authors, we assign 10% of the flux as uncertainty for pasture land.

We were unable to localize the number the referee is referring to in the 3rd paragraph of page 11.

We have clarified in the text in l7p24:

The NIR estimates do not come with an overall uncertainty, but based on their reporting of typical uncertainty for individual ecosystems, and personal communication, an approximate figure of 50% of the flux value was identified.

\* section 6 is poorly connected to the other sections, and the part of section 6 before the start of 6.1 sometimes sounds like a summary of the subsections 6.1 and 6.2

This has been answered as part of an earlier comment.

\*l14-17p14 and l25-29p19: the diagnostic assesses the sensitivity to the fossil fuel emissions in the part of Australia that is in the modeling domain, not the sensitivity to all fluxes in the whole Australia; in other places, and especially in the conclusion, the paper will state that potential errors from Australia need to be handled.

We have clarified this:

This is based on an analysis suggesting generally low sensitivity of CO<sub>2</sub> measurements at our stations in New Zealand to fluxes from the Australian region...

\* the logic behind the justification of the partition of the ocean regions in the second half of p14 is not really clear.

The partitioning of the ocean regions is guided by objective measures where available, but contains parameters that had to be chosen subjectively, as laid out in section 5.2.

\* l5p16: it is not the "uncertainty in the inverse modeling system" (which is something that would be difficult to quantify), it is the likely the uncertainty in the transport model

We have corrected this as part of our response to an earlier comment.

\* l7-10 p23 are poorly connected to the analysis above

This sentence provides additional information in the context of regional drought, which we believe is useful.

\* l17-20p27 are wrong, if posterior uncertainties are low, negative correlations between these uncertainties do not mean that the inversion is unable to distinguish the corresponding fluxes; in such cases, it would just mean that the residual uncertainty in the corresponding fluxes is due to such a problem of separation



Mathematically, any negative correlations mean the sum of the fluxes is better constrained than it would be if the correlations were zero. However, our choice of wording (“being unable to distinguish”) seemed too strong and led to confusion, so we edited the text:

Strong negative correlations between two regions would indicate that the inversion has difficulties to distinguish their individual flux components with the available data, while their sum is better constrained. Similarly, positive correlations are indicative of the difference of flux components being constrained better than each individually.

\* labels in the figures are often difficult to read

We have slightly increased the labels in Figure 8, where they appeared to be a little smaller than in the other figures. We are happy to respond to specific comments about which labels to change, but also think that the present sizes are readable provided figures will not be sized down.

\*I22-24 p21: at this stage of the manuscript, we do not know how the additional uncertainty from the sensitivity tests is included in the figure (this will be explained at I21-25p28 which are quite confusing)

We have added a reference to section 7.4 in the caption of Figure 10 to clarify:

The cyan shade represents the extra uncertainty obtained from the sensitivity cases (section 7.4).

## References

Gerbig et al. 2003, Toward constraining regional-scale fluxes of CO<sub>2</sub> with atmospheric observations over a continent: 2. Analysis of COBRA data using a receptor-oriented framework, First published: 17 December 2003, DOI: 10.1029/2003JD003770

Lauvaux, T., et al. (2008), Mesoscale inversion: First results from the CERES campaign with synthetic data, Atmos. Chem. Phys., 8(13), 3459–3471

Matross, D. M., et al. (2006), Estimating regional carbon exchange in New England and Quebec by combining atmospheric, ground-based and satellite data, Tellus, Ser. B, 58(5), 344–358.
